# Supplementary material for: Chronic Ketogenic Low Carbohydrate High Fat Diet Has Minimal Effects on Acid–Base Status in Elite Athletes
Source: PubMed Central journal article supplement (PMC5852812; doi:10.3390/nu10020236), 2018-02-18
Supplement: nutrients-10-00236-s001.pdf [file nutrients-10-00236-s001.pdf]

**Supplementary Table S1:** Example of a weekly menu for the low carbohydrate, high fat (LCHF) diet.

| Time                | Monday                                            | Tuesday                                                                               | Wednesday                                                          | Thursday                                            | Friday                                                                      | Saturday                                                           | Sunday                                                                    |
|---------------------|---------------------------------------------------|---------------------------------------------------------------------------------------|--------------------------------------------------------------------|-----------------------------------------------------|-----------------------------------------------------------------------------|--------------------------------------------------------------------|---------------------------------------------------------------------------|
| <b>Pre-training</b> | Peanut Butter cookies<br>Macadamia nuts           | Granola<br>Edam cheese                                                                | Egg<br>Cheese<br>Chocolate<br>pecan cake<br>Electrolytes/diet coke |                                                     | Low carb bread, butter & cheese                                             | Egg<br>Cheese<br>Chocolate<br>pecan cake<br>Electrolytes/diet coke |                                                                           |
| <b>Breakfast</b>    | Granola<br>Greek yoghurt<br>Almond milk           | Savory crepe<br>Bacon<br>Avocado                                                      |                                                                    | Berry & coconut parfait                             | Cauliflower rösti<br>Egg<br>Hollandaise sauce                               |                                                                    | Bircher muesli                                                            |
| <b>Lunch</b>        | Caesar salad                                      | Turkey & brie sandwich                                                                | Fried caulirice<br>Egg<br>Bacon                                    | Silverside, tomato, cheese & avocado sandwich       | Mushroom soup                                                               | Frittata<br>Avocado<br>Green salad                                 | Chicken, pesto, cheese & salad sandwich                                   |
| <b>Dinner</b>       | Lamb satay<br>Avocado<br>Green salad<br>Olive oil | Carbonara with zucchini noodles<br>Green salad<br>Olive oil<br>Choc coconut ice-cream | Chicken curry<br>Whipped cream<br>Berries                          | Beef taco salad<br>Crème fraiche<br>Green salad     | Salmon<br>Cauliflower risotto<br>Green salad<br>Berry tiramisu              | Beef burgers with low carb bread<br>Chocolate cake with cream      | Pizza with cauliflower base<br>Havarti cheese<br>Green salad<br>Olive oil |
| <b>Snacks</b>       | Peanut butter cookies<br>Macadamia nuts           | Lemon fat bomb<br>Granola<br>Edam cheese                                              | Vanilla cookie-dough amaze bites<br>Brie cheese<br>Almonds         | Nut balls<br>Buttered coffee<br>Choc and pecan cake | Choc pecan cake<br>Chocolate peanut fat bomb<br>Low CHO bread & edam cheese | Peanut butter cookies<br>Vanilla cookie-dough amazebites<br>Brie   | Peanut butter cookies<br>Low CHO bread & brie<br>Chunky nut cookies       |
| <b>Recovery</b>     | Recovery drink & whey protein                     | Recovery Drink                                                                        | Recovery Drink                                                     | Double chocolate shake                              |                                                                             | Recovery drink                                                     |                                                                           |

Table adapted with permission from Mirtschin, J.; Forbes, S.; Cato, L.; Heikura, I.; Strobel, N.; Hall, R.; Burke, L. Organisation of dietary control for training-nutrition intervention involving low carbohydrate high fat (LCHF) diet. *Int. J. Sport Nutr. Exerc. Metab.* (In Press).

**Supplementary Table S2:** Example of a weekly menu for the periodized carbohydrate availability (PCHO) diet.

| Time                | Monday                                                           | Tuesday                                                                                  | Wednesday                                                              | Thursday                                                                  | Friday                                                 | Saturday                                                                     | Sunday                                            |
|---------------------|------------------------------------------------------------------|------------------------------------------------------------------------------------------|------------------------------------------------------------------------|---------------------------------------------------------------------------|--------------------------------------------------------|------------------------------------------------------------------------------|---------------------------------------------------|
| <b>Pre-training</b> | Gatorade                                                         |                                                                                          | White bread,<br>honey &<br>butter<br>Juice<br>Gatorade/gel/<br>lollies |                                                                           | White bread,<br>jam & butter<br>Energy gel<br>Gatorade | White bread,<br>jam & butter<br>Juice<br>Gatorade/gel/<br>lollies            |                                                   |
| <b>Breakfast</b>    | Vita-brits<br>Milk<br>Banana<br>Honey/sugar                      | Pancakes<br>Berries<br>Maple<br>syrup<br>Greek<br>yoghurt                                |                                                                        | Cereal<br>Skim milk<br>White<br>bread &<br>jam                            | Omelette<br>Bagel<br>Spreads                           |                                                                              | Bircher<br>muesli<br>Fruit                        |
| <b>Lunch</b>        | Ham & salad<br>wrap<br>Fruit<br>Yoghurt                          | Turkey,<br>cranberry<br>& salad<br>sandwich<br>Yoghurt                                   | Fried Rice<br>Yoghurt                                                  | Silverside,<br>tomato &<br>cheese<br>sandwich<br>Yoghurt                  | Potato soup<br>Bacon<br>Bread<br>Fruit                 | Frittata<br>Fruit                                                            | Chicken,<br>pesto &<br>salad<br>sandwich<br>Juice |
| <b>Dinner</b>       | Chicken stir<br>fry<br>Salad                                     | Pasta with<br>Bolognese<br>sauce<br>Cheese<br>Salad<br>Ice cream<br>& chocolate<br>syrup | Chicken<br>curry<br>Rice<br>Fruit<br>Greek<br>yoghurt<br>Honey         | Mexican<br>mince<br>burritos<br>Salad<br>Crème<br>fraiche                 | Salmon<br>Risotto<br>Salad<br>Juice<br>Fruit & custard | Beef burger<br>Banana bread                                                  | Pizza                                             |
| <b>Snacks</b>       | Date balls<br>Chocolate<br>milk<br>Macadamia<br>nuts<br>Rice bar | Rice cakes<br>& peanut<br>butter/jam<br>Dried fruit<br>Skim milk                         | Nut balls<br>Fresh fruit<br>Chocolate<br>milk<br>Yoghurt               | Rice cakes<br>& peanut<br>butter /jam<br>Banana<br>Yoghurt<br>Dried fruit | Rice bar<br>Muesli bar<br>Fresh Fruit<br>Cashews       | Rice cakes &<br>peanut<br>butter/jam<br>Fresh fruit<br>Date balls<br>Yoghurt | Date balls<br>Yoghurt<br>Fruit<br>Nut balls       |
| <b>Recovery</b>     | Whey protein<br>& water                                          | Banana &<br>berry<br>smoothie                                                            | Sustagen<br>recovery<br>drink                                          | Banana &<br>berry<br>smoothie                                             | Whey protein<br>& milk                                 | Sustagen<br>recovery drink                                                   |                                                   |

Table adapted with permission from Mirtschin, J.; Forbes, S.; Cato, L.; Heikura, I.; Strobel, N.; Hall, R.; Burke, L. Organisation of dietary control for training-nutrition intervention involving low carbohydrate high fat (LCHF) diet. *Int. J. Sport Nutr. Exerc. Metab.* (In Press).

**Supplementary Table S3:** Example of a weekly menu for the high carbohydrate availability (HCHO) control group diet.

| Time                | Monday                                                     | Tuesday                                                                      | Wednesday                                                    | Thursday                                                            | Friday                                              | Saturday                                                               | Sunday                                      |
|---------------------|------------------------------------------------------------|------------------------------------------------------------------------------|--------------------------------------------------------------|---------------------------------------------------------------------|-----------------------------------------------------|------------------------------------------------------------------------|---------------------------------------------|
| <b>Pre-training</b> | White bread, butter & jam<br>Gatorade                      | Energy gel<br>Muesli bar<br>Gatorade                                         | White bread, honey & butter<br>Juice<br>Gatorade/gel/lollies | Energy gel<br>Muesli bar<br>Gatorade                                | Energy gel<br>Muesli bar<br>Gatorade                | White bread, jam & butter<br>Juice<br>Gatorade/gel/lollies             |                                             |
| <b>Breakfast</b>    | Vita-brits<br>Milk<br>Banana<br>Honey/sugar                | Pancakes<br>Berries<br>Maple syrup<br>Greek yoghurt                          |                                                              | Cereal<br>Skim milk<br>White bread & jam                            | Omelette<br>Bagel<br>Spreads                        |                                                                        | Bircher muesli<br>Fruit                     |
| <b>Lunch</b>        | Ham & salad wrap<br>Fruit<br>Yoghurt                       | Turkey, cranberry & salad sandwich<br>Yoghurt                                | Fried rice<br>Yoghurt                                        | Silverside, tomato & cheese sandwich<br>Yoghurt                     | Potato soup<br>Bacon<br>Bread<br>Fruit              | Frittata<br>Fruit                                                      | Chicken, pesto & salad sandwich<br>Juice    |
| <b>Dinner</b>       | Lamb stir fry<br>Rice                                      | Pasta with Bolognese sauce<br>Cheese<br>Salad<br>Ice cream & chocolate syrup | Chicken curry<br>Rice<br>Fruit<br>Greek yoghurt<br>Honey     | Mexican mince burritos<br>Salad<br>Crème fraiche                    | Salmon risotto<br>Salad<br>Juice<br>Fruit & custard | Beef burger<br>Banana bread                                            | Pizza                                       |
| <b>Snacks</b>       | Date balls<br>Chocolate milk<br>Macadamia nuts<br>Rice bar | Rice cakes & peanut butter/jam<br>Dried fruit<br>Skim milk                   | Nut balls<br>Fresh Fruit<br>Chocolate milk<br>Yoghurt        | Rice cakes & peanut butter /jam<br>Banana<br>Yoghurt<br>Dried fruit | Rice bar<br>Muesli bar<br>Fresh fruit<br>Cashews    | Rice cakes & peanut butter/jam<br>Fresh fruit<br>Date balls<br>Yoghurt | Date balls<br>Yoghurt<br>Fruit<br>Nut balls |
| <b>Recovery</b>     | Sustagen recovery drink                                    | Banana & berry smoothie                                                      | Sustagen recovery drink                                      | Banana & berry smoothie                                             | Whey protein & milk                                 | Sustagen recovery drink                                                |                                             |

Table adapted with permission from Mirtschin, J.; Forbes, S.; Cato, L.; Heikura, I.; Strobel, N.; Hall, R.; Burke, L. Organisation of dietary control for training-nutrition intervention involving low carbohydrate high fat (LCHF) diet. *Int. J. Sport Nutr. Exerc. Metab.* (In Press).
